# Supplementary material
Source: MDPI journal article supplement (https://www.mdpi.com/2071-1050/13/5/2571)
Supplement: s1 [file s1]

Archive with 2 entries (2 files):
- Supplementary_material/Supplementary material 1_survey questionnaire and interview notes.pdf
- Supplementary_material/Supplementary material_2_additional results graphs.pdf
