# Supplementary material
Source: MDPI journal article supplement (https://www.mdpi.com/2071-1050/13/5/2571)
Supplement: s1 [file s1 › Supplementary_material/Supplementary material_2_additional results graphs.pdf]

## Supplementary material 2: Results graphs for selected blue-green and grey infrastructure combinations

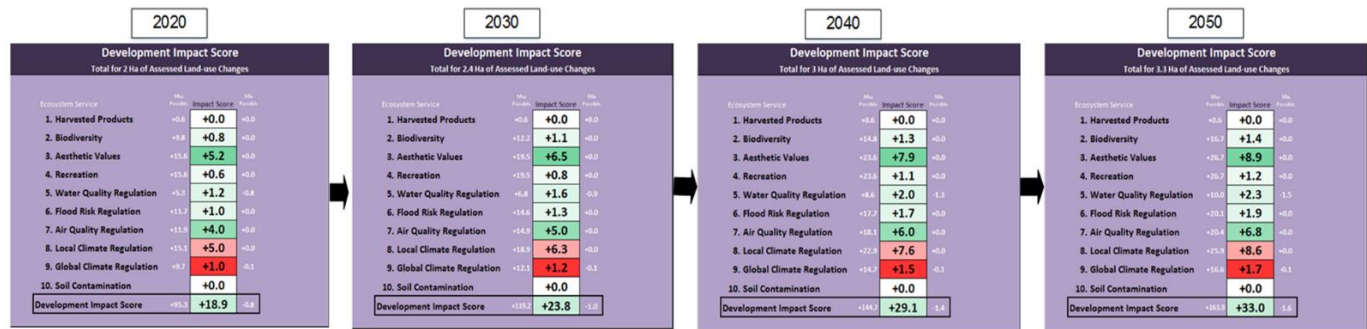

Figure S1: NCPT scores for AP1- Gradual implementation of Bioretention cells

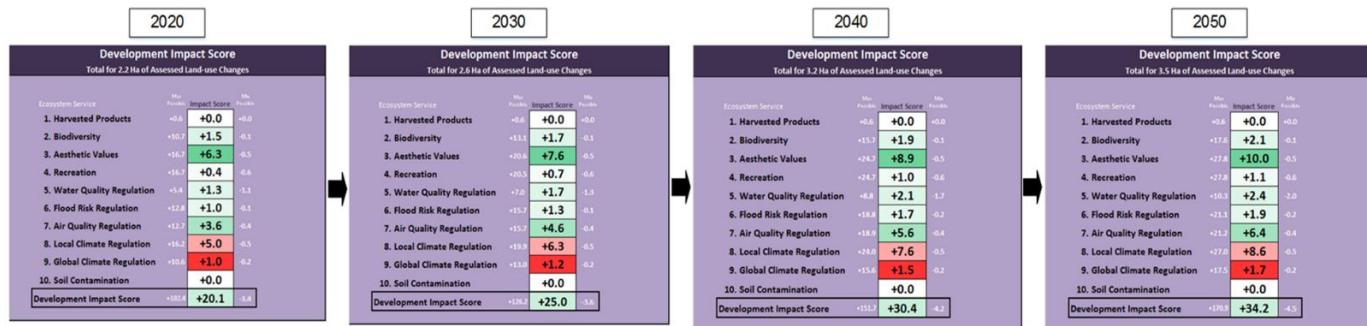

Figure S2: NCPT scores for AP2- Pond + Gradual implementation of Bioretention cells

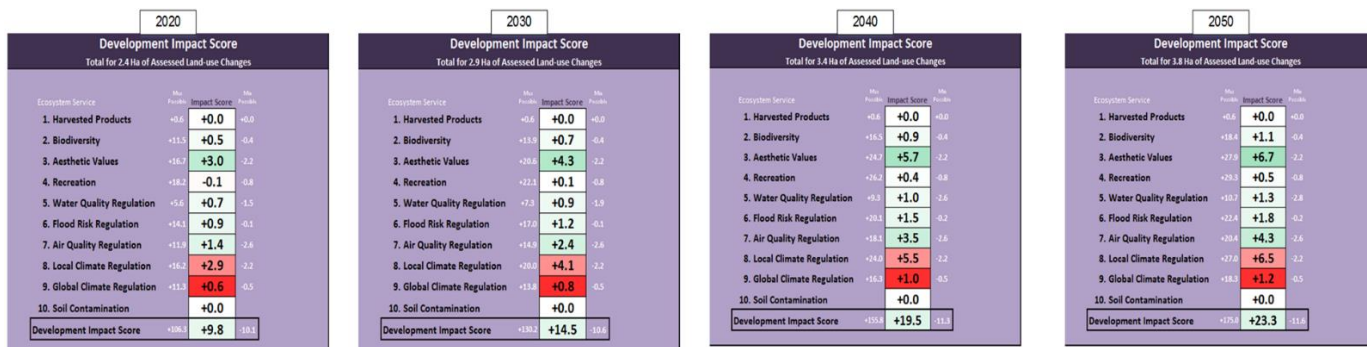

Figure S3: NCPT scores for AP3- Pipe system + Gradual implementation of Bioretention cells

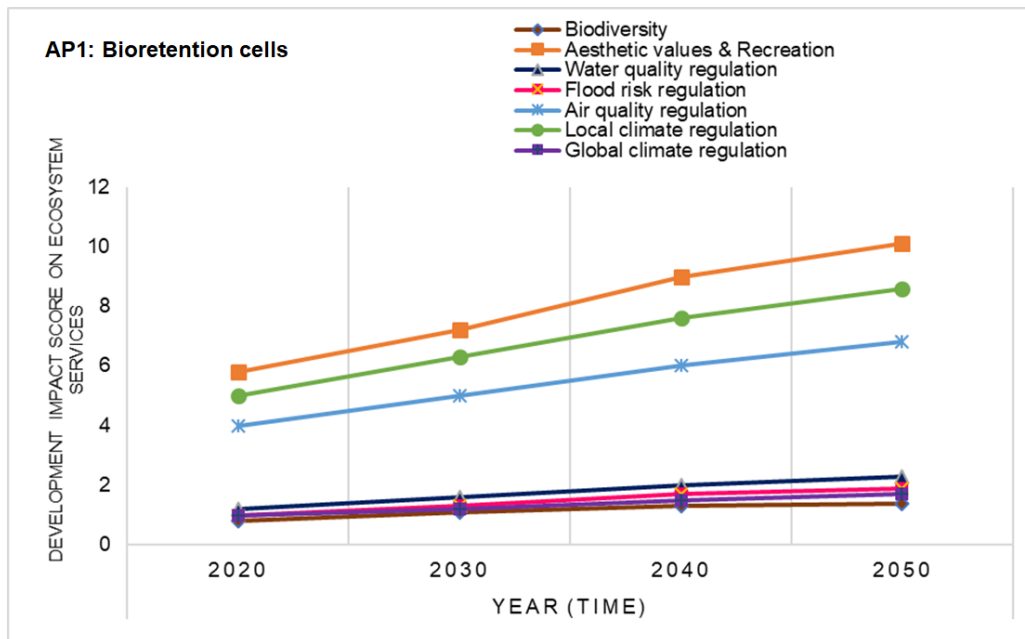

Figure S4: Development impact of bioretention cells on ecosystem services

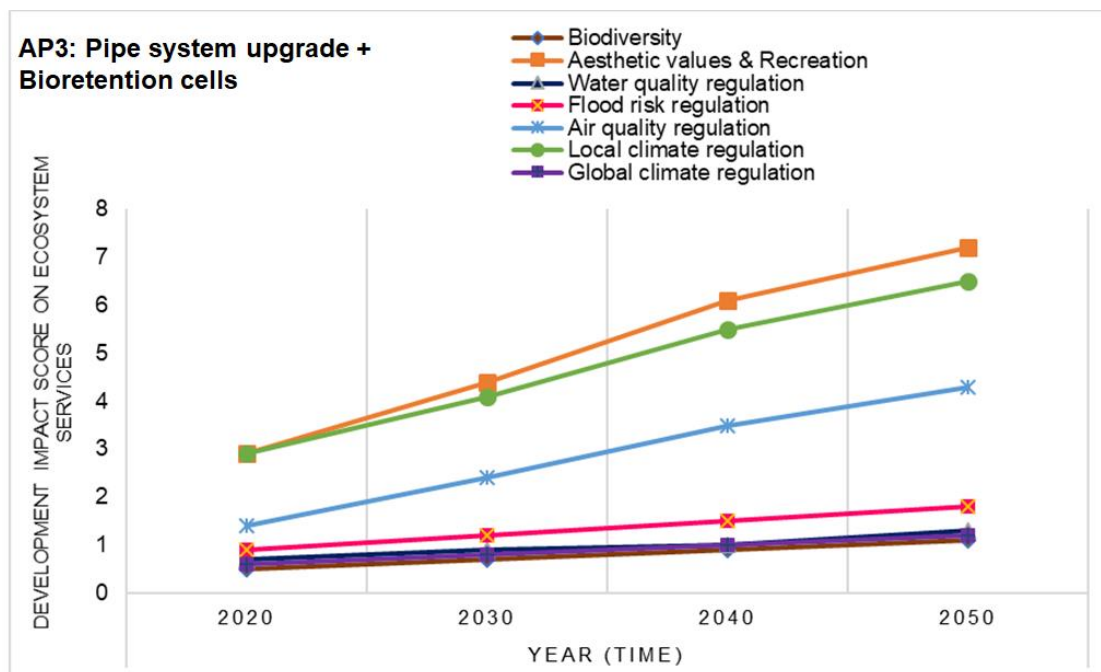

Figure S5 Development impact of a pipe system upgrade and bioretention cells green-grey combination on ecosystem services
